## **White matter microstructure in Parkinson's disease with and without elevated REM sleep muscle tone**

Rémi Patriat<sup>1,\*</sup>, Pramod K. Pisharady<sup>1,\*</sup>, Sommer Amundsen-Huffmaster<sup>2</sup>, Maria Linn-Evans<sup>2,3</sup>, Michael Howell<sup>2</sup>, Jae Woo Chung<sup>2</sup>, Matthew N. Petrucci<sup>2</sup>, Aleksandar Videnovic<sup>4</sup>, Erin Holker<sup>5</sup>, Joshua De Kam<sup>2</sup>, Paul Tuite<sup>2</sup>, Christophe Lenglet<sup>1</sup>, Noam Harel<sup>1</sup>, Colum D. MacKinnon<sup>2</sup>

<sup>1</sup>Center for Magnetic Resonance Research, Department of Radiology, University of Minnesota, Minneapolis, MN, USA

<sup>2</sup>Department of Neurology, University of Minnesota, Minneapolis, MN, USA

<sup>3</sup>Department of Neuroscience, University of Minnesota, Minneapolis, MN, USA

<sup>4</sup>Department of Neurology, Massachusetts General Hospital, Boston, MA, USA

<sup>5</sup>Department of Rehabilitation Medicine, University of Minnesota, Minneapolis, MN, USA

\*These authors contributed equally to this work and share the first authorship

### Corresponding author:

Rémi Patriat, PhD

2021 6<sup>th</sup> Street S.E.

Minneapolis, MN 55455

612-626-2001

PATRI108@morris.umn.edu

Running title: White matter differences in PD with RSWA

## Abstract

The mechanisms contributing to increased expression of motor and cognitive impairment in people with Parkinson's disease who lack muscle atonia during rapid eye movement (REM) sleep compared to those with muscle atonia are poorly understood. This study used tract-based spatial statistics to compare diffusion measures of white matter microstructure between people with Parkinson's disease with and without REM sleep without atonia as well as the relationships of these measures to motor and cognitive function.

Thirty-eight individuals with mild-to-moderate Parkinson's disease and twenty-one matched control subjects underwent ultra-high-field MRI (7Tesla), quantitative motor assessments of gait and bradykinesia, and neuropsychological testing. The Parkinson's disease cohort was separated post-hoc into those with and without elevated chin or leg muscle activity during REM sleep based on polysomnography findings.

Fractional anisotropy was significantly higher, and radial and mean diffusivity significantly lower, in diffuse regions of the corpus callosum, projection, and association white matter pathways in the Parkinson's group with normal REM sleep compared to controls. In contrast, there was no significant difference in fractional anisotropy between the Parkinson's group with elevated muscle tone and controls. Fractional anisotropy was also significantly higher in a subset of pathways in the Parkinson's disease group with normal REM sleep muscle tone compared to those with elevated REM sleep muscle tone. The group with elevated REM sleep muscle tone had significant impairments in gait and upper arm speed compared to controls and significantly worse scores in specific cognitive domains (executive function, visuospatial memory) compared to the Parkinson's disease group with normal REM sleep muscle tone. Regression analyses showed that gait speed and step length in the Parkinson's disease cohort were predicted by measures of mean fractional anisotropy of the anterior corona radiata, whereas elbow flexion velocity was predicted by fractional anisotropy of the superior corona radiata. Visuospatial memory task performance was predicted by the radial diffusivity of the posterior corona radiata. These findings demonstrate that people with mild-to-moderate severity of Parkinson's disease who have normal muscle tone during REM sleep show alterations in white matter microstructure that are associated with preserved motor and cognitive function, but these adaptations are reduced or absent in those with increased REM sleep motor tone.

**Keywords:** Parkinson's Disease, RBD, Diffusion MRI, 7T MRI

**Abbreviations:** 7T = 7 Tesla, AD = axial diffusivity, BDI = Beck Depression Inventory, BVMT = Brief Visuospatial Memory Test, D-KEFS = Delis-Kaplan Executive Function System, dMRI = diffusion magnetic resonance imaging, DRS = Dementia Rating Scale, FA = fractional anisotropy, MD = mean diffusivity, MDS-UPDRS = Movement Disorders Society Unified Parkinson's Disease Rating Scale, MoCA = Montreal Cognitive Assessment, PSG = polysomnography, RBD = REM sleep Behavior Disorder, RD = radial diffusivity, REM = Rapid Eye Movement, RSWA = REM sleep without atonia, TBSS = tract-based spatial statistics, WAIS-IV = Wechsler Adult Intelligence Scale – IV, WCST = Wisconsin Card Sorting Test.

## Introduction

Under normal physiological circumstances, REM sleep is characterized by vivid dream mentation combined with skeletal muscles paralysis. This normal REM atonia is lost in REM sleep Behavior Disorder (RBD), a common disorder in people with Parkinson's disease often manifesting years to decades before diagnosis of overt neurodegenerative disease.<sup>1-4</sup> RBD is quantified during polysomnography by increased muscle activity during REM sleep, termed REM sleep without atonia (RSWA).<sup>5</sup> Isolated RBD is recognized as a prodromal stage of overt synucleinopathy with approximately 75% of individuals eventually phenocopying to Parkinson's Disease, dementia with Lewy Bodies, or multiple system atrophy within 12 years.<sup>6</sup> Isolated RBD is estimated to be present in about 1% of the population,<sup>7</sup> but it is considerably more common in people with Parkinson's disease with an incidence of 16-47%.<sup>2, 3, 8</sup> The co-expression of Parkinson's disease with RBD is associated with an increased likelihood and severity of cognitive impairment and a motor presentation that is dominated by an akinetic-rigid syndrome, postural instability, and gait disturbances compared to those without RBD.<sup>9-13</sup> Currently, the mechanisms contributing to increased involvement of motor and cognitive systems in Parkinson's disease with RBD are poorly understood.

Differences in the expression and rate of progression of Parkinson's disease between individuals reflect, in part, the extent of neuronal loss in nigral and extranigral structures, but adaptive and maladaptive changes in the structural and functional connectivity of extranigral networks may also contribute to the masking and unmasking of motor and non-motor signs.<sup>14</sup> Alterations in white matter microstructure, as assessed using measures derived from diffusion magnetic resonance imaging (dMRI), have been described in people with early-stage Parkinson's

disease.<sup>15-17</sup> These studies have shown significantly higher fractional anisotropy (FA) and lower mean and radial diffusivities (MD, RD), reflecting increased directionality of water diffusion, in callosal, projection and association fibers in early-stage Parkinson's Disease compared with controls. Worsening of disease severity is associated with a progressive decrease in FA and increase in MD and RD.<sup>17-25</sup> FA in the corpus callosum has also been shown to be inversely correlated with clinical measures (UPDRS III) of disease severity.<sup>26</sup> The presence of increased FA across diffuse white matter tracts in early-stage Parkinson's disease may reflect adaptive "neural compensations" possibly acting to preserve motor and cognitive function, or masking the expression of signs of early neurodegenerative changes in white matter, such as the loss of cortico-cortical and transcallosal fibers.<sup>16, 26</sup> The latter can lead to increased anisotropy in regions where corticofugal and crossing fibers intersect.

If measures of white matter microstructure reflect the state of compensatory or neurodegenerative responses in motor and non-motor circuits, then it can be hypothesized that differences in motor and cognitive behavior between people with Parkinson's disease with and without elevated muscle tone during REM sleep will be associated with alterations in FA, RD and MD. Accordingly, this study used ultra-high field (7Telsa – 7T) MRI and tract-based spatial statistics (TBSS) to compare the microstructure of white matter pathways between people with Parkinson's disease with RSWA (PD+RSWA), people with Parkinson's disease without RSWA (PD-RSWA), and sex and age matched healthy adults. We hypothesized that dMRI measures in frontal and sensorimotor-related white matter tracts would be significantly higher in the PD-RSWA group compared to the matched control and PD+RSWA groups, and that measures of motor and cognitive function may be correlated with dMRI measure in the Parkinson's disease cohort.

## **Materials and methods**

### **Study participants and design**

Sixty-two participants completed testing. Two participants were excluded post-hoc from the analysis due to image quality issues (e.g. excessive subject motion), and one participant was excluded due to a change in diagnosis. The final dataset included data from 38 individuals with mild-to-moderate severity of Parkinson's disease and 21 healthy older adults who were sex- and

age-matched to the Parkinson's disease group. A priori sample size (minimum of 14/group) was determined based on an estimated effect size of 0.76 for the difference in mean FA of the corticospinal tract of controls and PD15 (power = 85%, alpha = 0.05). A summary of the demographics and clinical characteristics of the participants is shown in Table 1. Clinical diagnosis of Parkinson's disease was determined by movement disorders neurologists according to the Movement Disorder Society clinical diagnostic criteria for Parkinson's disease.<sup>27</sup> Inclusion criteria included age 21-79 years and the ability to ambulate 50 m without an assistive device. Participants were excluded for any additional neurological disorder, a score of less than 22/30 on the Montreal Cognitive Assessment (MoCA),<sup>28, 29</sup> musculoskeletal disorders that significantly affected movement, implanted deep brain stimulators or other surgeries to treat Parkinson's Disease, pregnancy, untreated sleep apnea, or the presence of non-MRI compatible medical implants or devices.

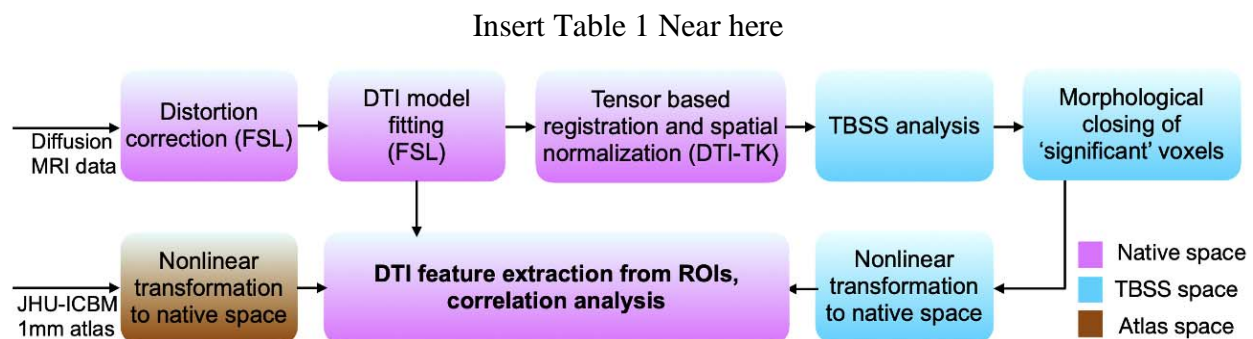

**Figure 1.** Flow diagram depicting the image processing and analysis pipeline. Words in parenthesis indicate the software being used for a particular step. TBSS = Tract-based spatial statistics. DTI = Diffusion tensor imaging. MRI = Magnetic resonance imaging.

All participants underwent a battery of clinical assessments including the Movement Disorders Society Unified Parkinson's Disease Rating Scale (MDS-UPDRS) Part III evaluation, Hoehn and Yahr staging, a full neuropsychological assessment battery, overnight in-laboratory polysomnography (PSG), a 7T MRI scan and quantitative motor assessments. Motor testing, clinical examinations and MRI scans were conducted in the practically-defined off-medication state following overnight withdrawal of levodopa and dopamine agonists and/or 48-hour withdrawal from long-acting dopaminergic medications. Overnight PSG and neuropsychological testing were conducted with the participant in their usual medication state. All assessors and

signal processors were blinded to the disease state and group category. The study was approved by the Institutional Review Board at the University of Minnesota, and written informed consent was obtained from all the participants according to the Declaration of Helsinki prior to inclusion into the study.

### **Classification of participants according to RSWA**

All participants completed an overnight PSG to evaluate sleep and quantify RSWA. PSGs were scored by a single rater (AV), blinded to disease state, using the American Academy of Sleep Medicine Manual for the Scoring of Sleep and Associated Events to identify excessive sustained (tonic) and transient (phasic) muscle activity during REM sleep.<sup>30</sup> The level of tonic or phasic RSWA was used to separate the Parkinson's disease participants into normal (PD-RSWA) or abnormally elevated (PD+RSWA) muscle tone groups. Participants were classified as having PD+RSWA based on the percentage of REM sleep with elevated tonic or phasic muscle activity in the chin (submentalis), arms (flexor digitorum superficialis) or legs (tibialis anterior).<sup>11</sup>

### **Motor testing**

Quantitative measures of steady-state gait and ballistic arm movements were collected in all subjects. Spatial and temporal metrics of steady-state gait were collected by walking continuously in an oval-shaped course that contained a 10 m long pressure-sensitive gait mat (Gaitrite, Franklin, NJ, USA). A minimum of 35 steps were collected on the mat to ensure reliability.<sup>31</sup> The primary outcome measures were gait speed, stride length, and right and left step length (normalized to leg length). Upper limb bradykinesia was assessed by having subjects perform a self-initiated (uncued) ballistic elbow flexion movement to a target at 72 degrees ( $\pm 3$  deg. target zone) using a custom-built manipulandum. Subjects were instructed to move as "fast as possible to the target" and hold the final position until instructed to return to the start position. The primary outcome variable was peak velocity. The ballistic movement data were collected using a CED Power 1401 data acquisition interface paired with Signal software (Cambridge Electronic Design, Ltd., Cambridge, UK) at a sampling rate of 2000 Hz and processed using custom MATLAB software (MathWorks, Natick, MA, USA).

### **Neuropsychological evaluations**

The neuropsychological battery was designed to assess attention and executive functioning, initiation-perseveration, construction, conceptualization, memory, visuospatial abilities and visual memory, verbal memory, language abilities, motivation, mood state and emotion in people with Parkinson's Disease. These tests included: Spatial Span from Wechsler Memory Scale - 3), Wechsler Adult Intelligence Scale - IV (WAIS-IV; Matrix Reasoning, Digit Span), Rey Complex Figure (copy trial), Boston Naming Test – 2, Delis-Kaplan Executive Function System (D-KEFS Verbal Fluency), Stroop (Golden version), Wisconsin Card Sorting Test (WCST)- 64, Hopkins Verbal Learning Test – Revised, Brief Visuospatial Memory Test (BVMT) – Revised, Mattis Dementia Rating Scale 2 (DRS-2), Beck Depression Inventory-2 (BDI-2).

### **MRI scanning protocol**

Participants were scanned on a 7T MRI scanner (Magnetom 7T Siemens, Erlangen, Germany) at the Center for Magnetic Resonance Research of the University of Minnesota. The scanner was equipped with SC72 gradients capable of 70 mT/m and a 200 T/m/s slew rate using a 32-element head array coil (Nova Medical, Inc., Burlington, MA, USA). Whenever subject head size enabled enough space in the coil, dielectric pads were utilized in order to enhance signal in the temporal regions. The scanning protocol consisted of diffusion-weighted images covering the whole brain (50 gradient directions, b-value = 1500 s/mm<sup>2</sup>, 4 additional b<sub>0</sub>-volumes, 1.25 mm isotropic, 6.5 minutes scan time) and a T1-weighted image (0.6 mm isotropic, 6.5 minutes scan time).<sup>32</sup> Two sets of diffusion data were collected during each session, with reversed phase encoding directions (anterior-to-posterior and posterior-to-anterior). These datasets were subsequently combined to correct for distortions and to increase the signal to noise ratio, as described below.

### **MRI data processing and analysis**

Fig. 1 shows a block diagram of the imaging data processing and analysis steps. The data were corrected for distortions due to eddy currents, susceptibility-induced off-resonance artifacts and subject motion.<sup>33, 34</sup> A DTI model was subsequently fitted to the corrected data using FSL,<sup>35</sup> and FA, RD, MD, and axial diffusivity (AD) were calculated. For the whole brain data analysis, we ran the TBSS algorithm in FSL, improved with tensor-based registration<sup>36</sup> and spatial normalization available in DTI-TK.<sup>37</sup> The improved spatial normalization and tensor-based registration using DTI-TK has been shown to produce fewer false positives compared to the

standard registration available in FSL.<sup>37</sup> Once the data are registered, the TBSS performs a skeletonization of the white matter and projection of the DTI features, such as FA, onto this white matter skeleton. We conducted the TBSS analysis with four categories of pairings of the data: i) all Parkinson's disease vs. healthy subjects, ii) PD-RSWA vs. healthy subjects, iii) PD+RSWA vs. healthy subjects, and iv) PD-RSWA vs. PD+RSWA.

### **Statistical Analysis of MRI data**

Nonparametric permutation inference of the skeletonized white matter was done using the 'randomise' algorithm<sup>38</sup> in FSL. The algorithm provides p-values corrected for multiple comparisons along the white matter skeleton, estimated using a threshold-free cluster enhancement. In order to extract diffusion features for each participant, a binary image of the significant clusters (from the group analysis) was first created. Then, a morphological closing operation with a kernel size of 3x3 voxels was performed to fill in any holes within the binary image. This closed binary image was transformed from the TBSS space to individual native space through linear and nonlinear registrations ('flirt' and 'fnirt' algorithms from FSL). The anatomical locations of the significant clusters were identified (for each subject) by computing the intersection of these regions with the JHU ICBM 1mm atlas<sup>38</sup> warped into the native data space. We then extracted the average of the diffusion features (FA, MD, RD, and AD) from the voxels within each of these intersecting regions of interest (ROIs).

### **Statistical analysis of behavioral differences and associations with diffusion metrics**

Demographic features between groups were compared using a one-way ANOVA (MoCA), t-test (MDS-UPDRS Part III total score), Mann-Whitney U (disease duration, Hoehn and Yahr stage, levodopa daily equivalent) or Kruskal-Wallis test (age, years of education). Homogeneity of variance of the behavioral variables was tested using Levene's Test of Equality of Error Variances and either a univariate ANOVA or Kruskal-Wallis test was used to test for main effects of groups (PD+RSWA, PD-RSWA, healthy older adults). For variables with bilateral measures, a repeated measures ANOVA was used with factors of group and side. Age and sex were included as covariates in the analysis of the movement data and years of education was added as a covariate to the analyses of the cognitive data. Post-hoc interaction effects were modeled using Tukey's Honestly Significant Difference test.



Partial correlations, controlled for age and sex, were used to examine associations between behavioral and white matter diffusion measures in the Parkinson's disease cohort. A multivariate step-wise linear regression was used to identify the diffusion measures that best predicted the motor and cognitive outcomes measures. The regression analyses were controlled for age, sex, disease duration and levodopa equivalent daily dose for predictions of motor outcomes. Years of education was added as a factor for predictions of cognitive outcomes. Statistical analysis was performed using IBM SPSS 25 (IBM Corp., Armonk, NY, USA) and the significance level was set at  $p < 0.05$  for the ANOVA/Kruskal-Wallis and post hoc tests. The statistical threshold for the correlation and multivariate regression analyses was set at  $p < 0.01$ .

### **Data availability**

The derived data that support the findings of this study will be made available on reasonable request, for the purposes of reproducing the results presented, subject to institutional approval.

## **Results**

### **Demographics**

There were no significant differences between the control, PD-RSWA and PD+RSWA groups for the variables sex, age, education and MoCA score (Table 1). Similarly, there was no significant difference between the Parkinson's disease groups in age at diagnosis, years since diagnosis, Hoehn and Yahr stage or total MDS UDRS III score. Levodopa equivalent dose was significantly higher in the PD+RSWA group compared with the PD-RSWA group ( $p = 0.032$ ).

### **TBSS: Parkinson's disease versus healthy older adults**

Higher FA and lower MD, RD, and AD were observed in the Parkinson's disease compared to the control group (Fig. 2). MD and RD presented more spatially widespread differences between groups than FA and AD. Clusters with significantly higher FA or lower RD and MD in the Parkinson's disease group included: corpus callosum (regions of genu, body and splenium), anterior and posterior limbs of the internal capsule, external capsule, anterior, superior and posterior corona radiata, posterior thalamic radiation, superior longitudinal fasciculus, superior fronto-occipital fasciculus, tapetum, and cerebral peduncle (bilateral findings for all the ROIs).

Lower MD and RD were also seen in the cingulum and sagittal stratum in the Parkinson's disease group. Lower AD was observed in the corpus callosum (regions of genu and body), anterior limb of internal capsule (only left), external capsule (only left), and anterior and superior corona radiata (both bilateral).

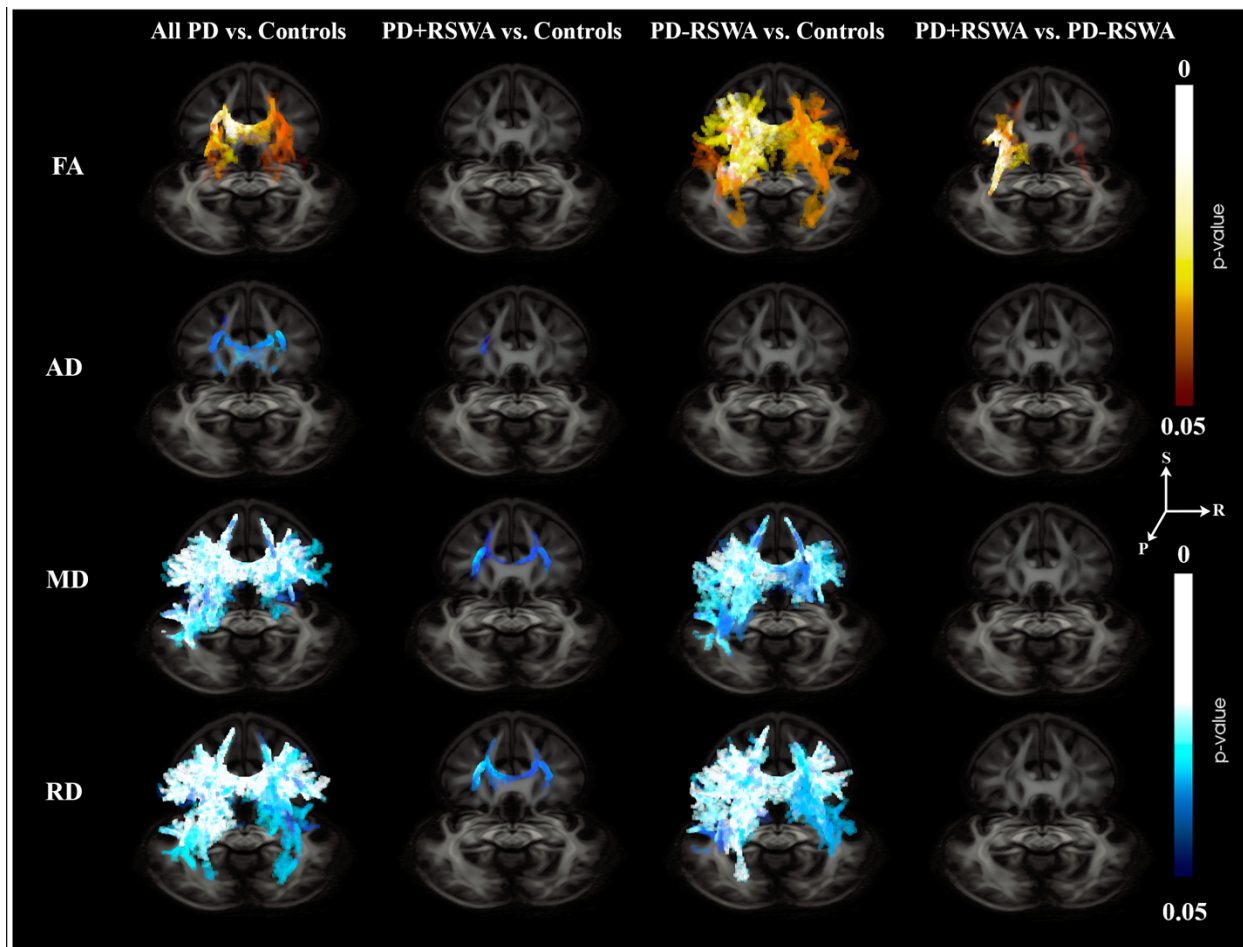

**Figure 2.** 3D axial views TBSS results showing the regions where statistically significant differences between different groups (columns) were observed, in different diffusion metrics (rows). S= superior, R = right, P = posterior. Warm colors show a positive difference while cold colors show a negative difference.

### **TBSS: PD+RSWA versus healthy older adults**

MD and RD were significantly lower in the PD+RSWA group in the corpus callosum (regions of genu and body), anterior limb of the internal capsule, external capsule, and anterior and superior

corona radiata (bilateral findings for all the ROIs, Fig. 2 & 3). Lower AD in the PD+RSWA group was seen in the anterior and superior corona radiata (only left side for both ROIs).

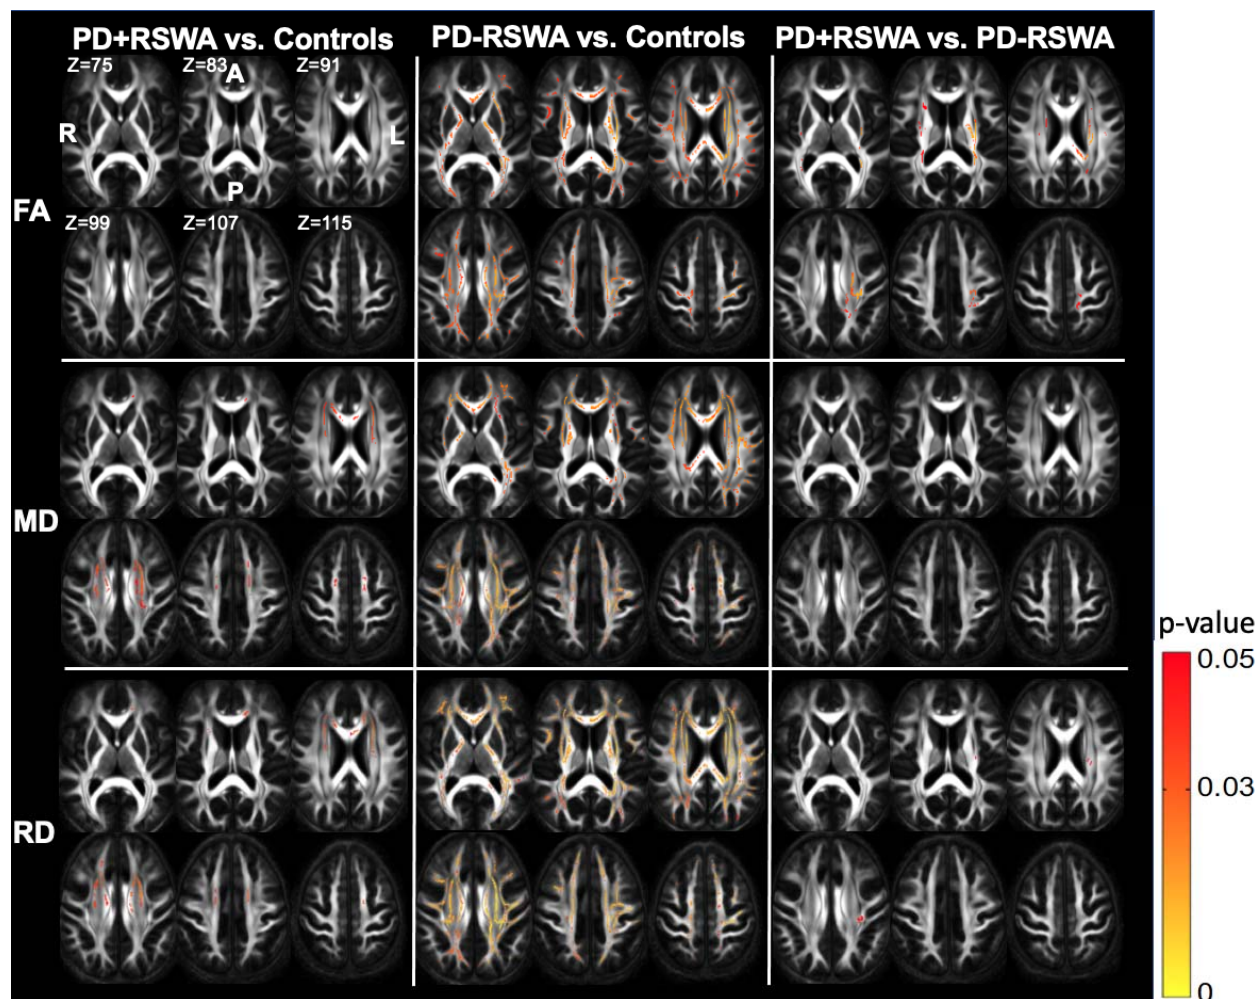

**Figure 3.** 2D axial views of the TBSS results showing the main regions where statistically significant differences between different groups (columns) were observed, in different diffusion metrics (rows). R = right, L = left, A = anterior, P = posterior.

### **TBSS: PD-RSWA versus healthy older adults**

The PD-RSWA group exhibited significantly higher FA values and lower MD and RD compared to the healthy control group in many regions including the corpus callosum (regions of genu, body and splenium), anterior and posterior limbs of the internal capsule, retrolenticular part of internal capsule, external capsule, anterior, superior and posterior corona radiata, posterior thalamic radiation, superior longitudinal fasciculus, superior fronto-occipital fasciculus, tapetum,

cingulum (bilateral findings for all the ROIs), and sagittal stratum (only left, Fig. 2 & 3). In addition, higher FA was observed in the regions of cerebral peduncle (bilateral), corticospinal tract (only right), and superior cerebellar peduncle (only right). AD did not show significant differences in any of these regions.

### **TBSS: PD+RSWA versus PD-RSWA**

The PD-RSWA group showed higher FA compared to the PD+RSWA group in multiple regions including corpus callosum (regions of body and splenium), anterior and posterior limbs of the internal capsule, retrolenticular part of internal capsule, external capsule, anterior, superior and posterior corona radiata, posterior thalamic radiation, superior longitudinal fasciculus, superior fronto-occipital fasciculus, and tapetum (bilateral for all the ROIs) (Fig. 2 & 3). Lower RD was seen in the PD-RSWA group in the regions of posterior limb of internal capsule, superior and posterior corona radiata, external capsule, and superior longitudinal fasciculus (only left for all the ROIs), compared to the PD+RSWA group. There were no significant differences in MD and AD between these groups.

### **Motor Assessments**

Significant main effects of group were seen for measures of normalized gait speed, stride and step lengths ( $F > 3.612$ ,  $p < 0.035$ ; no effect of side or side x group interaction for step length) (Fig. 4). Sex, but not age, was a significant covariate for gait speed ( $p = 0.025$ ). Post-hoc analyses demonstrated that gait speed, stride and step lengths (bilateral) were significantly lower in the PD+RSWA group compared with healthy older adults ( $p < 0.037$ ). There was no significant group effect for cadence and no significant differences in gait measures between the PD+RSWA and PD-RSWA groups. Peak elbow flexion velocity during ballistic arm movement also showed a significant main effect of group ( $F = 3.747$ ,  $p = 0.031$ ). Age and sex were significant covariates ( $p < 0.018$ ). There was no effect of side or side x group interaction effect. Post-hoc tests showed that movement speed was significantly lower in the PD+RSWA group compared with healthy older adults for both right and left arm movements ( $p < 0.034$ ).

## Motor Assessments

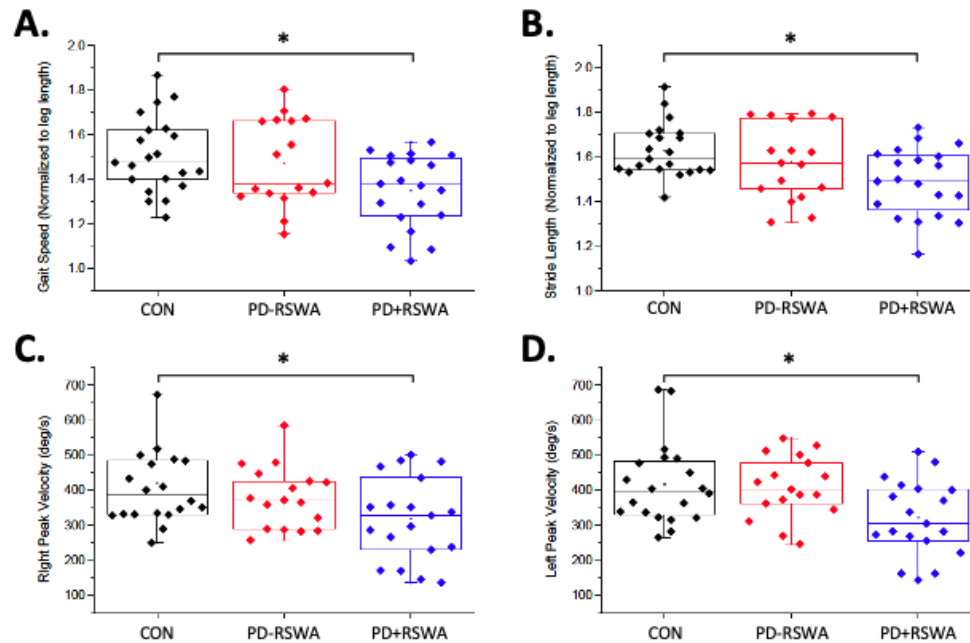

## Cognitive Assessments

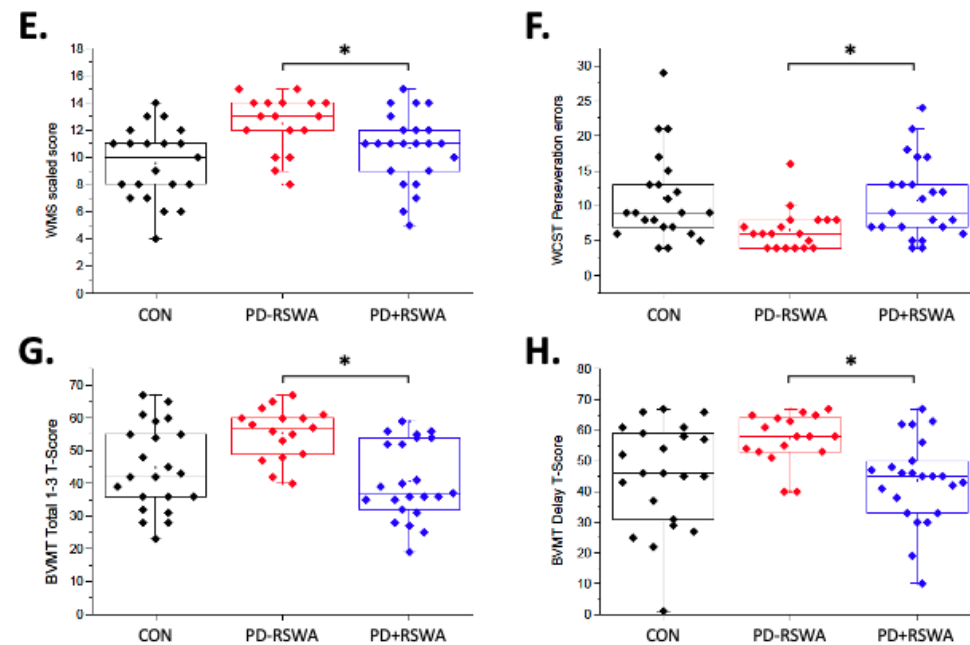

**Figure 4.** Summary of behavioral results. Plots A-B show the average normalized gait speed and normalized stride length during steady-state gait for each individual in the control (CON=black), PD-RSWA (red) and PD+RSWA (blue) groups. Plots C-D show the average peak velocities during ballistic elbow movement. Normalized gait speed, step length and right and left peak elbow movement velocity were significant lower in the PD+RSWA group compared to healthy

older adults ( $* = p < 0.037$ ). Plots E-H show the results from some of the cognitive tests including the Wechsler Memory Scale – Scaled Score (WMS) (plot E), Wisconsin Card Sorting Task (WCST) – total number of perseveration errors (plot F), Brief Visual Memory test (BVMT) – total score from trials 1 to 3 (plot G), and BVMT delay T-score (plot G). Scores for each of these tests were significantly lower in the PD+RSWA group compared to the PD-RSWA group ( $* = p < 0.042$ ). PD+RSWA= Parkinson’s disease with RSWA. PD-RSWA= Parkinson’s disease without RSWA.

### **Neuropsychological Assessments**

Cognitive test performance was different between the PD-RSWA and PD+RSWA groups in specific domains (Fig. 4). There were main effects of group for measures of spatial-sequential working memory (Spatial Span subtest of the WMS-3 :  $F > 6.16$ ,  $p < 0.005$ ), visuospatial memory (BVMT-R, Trials 1, 2, 3 and total, delay raw score and T-score:  $F > 6.795$ ,  $p < 0.003$ ) and executive function (WCST-64, number of categories, perseveration errors, conceptualization level response:  $F > 5.05$ ,  $p < 0.011$ ). Post-hoc tests showed that spatial-sequential working memory scores and executive function scores were significantly better in the PD-RSWA compared to the PD+RSWA group ( $p < 0.042$ ). Visuospatial memory was significantly better in the PD-RSWA group compared to both the PD+RSWA group and healthy older adults ( $p < 0.04$ ). No significant differences between groups were seen for the other neuropsychological tests.

### **Relationships between white matter diffusion measures and behavior**

Less severity of motor disease and better performance on motor tasks was associated with higher FA (or lower RD and MD) (Table 2). Total motor MDS-UPDRS III and axial subscore were inversely correlated with FA in the right superior corona radiata. The MDS-UDPRS III axial subscore was positively correlated with RD in the right superior corona radiata, right and left superior longitudinal fasciculus and MD in the left superior longitudinal fasciculus. Step-wise linear regression showed that total MDS-UPDRS III score was predicted by FA of the right superior corona radiata whereas MDS-UPDRS axial subscore was predicted by RD of the right superior longitudinal fasciculus.

### Insert Table 2 Near Here

Normalized gait speed positively correlated with FA of the right and left anterior corona radiata (Fig. 5). Normalized stride length correlated with FA of the left anterior corona radiata and left posterior limb of the internal capsule. Normalized step length (right) correlated with FA of the right anterior corona radiata while the left side correlated with FA of left anterior corona radiata and left posterior limb of the internal capsule. Step-wise linear regression analyses showed that a model that included FA of the right anterior corona radiata and left posterior limb of the internal capsule significantly predicted normalized gait speed. FA of the left anterior corona radiata significantly predicted normalized stride length and left step length, whereas FA of the right anterior corona radiata predicted right step length. Right and left peak elbow flexion velocity were positively correlated with FA of the left superior corona radiata and inversely correlated with RD of the left superior corona radiata. Right elbow flexion velocity was also inversely correlated with MD of the left superior longitudinal fasciculus. Multiple regression analyses showed that right peak elbow flexion velocity was significantly predicted by FA of the left superior corona radiata and superior longitudinal fasciculus, RD of posterior thalamic radiation and MD of superior longitudinal fasciculus. Left peak elbow flexion velocity was significantly predicted by a model that included only FA of the left superior corona radiata (right superior corona radiata FA also predicted left velocity,  $p < 0.003$ , but did not add further to the fit of the model beyond that provided by the left superior corona radiata).

Better performance on the neuropsychological assessments in the Parkinson's disease group was associated with higher FA or lower RD, MD and AD in specific white matter pathways. Partial correlations between cognitive and diffusion measures did not reach significance after control for age, sex and education. However, regression analyses showed that RD of the left posterior corona radiata was a significant predictor of the BVMT (including scores for trials 1, 2 and 3, total of trials 1-3, total of trial 1-3 T-score and the delay raw and delay T-scores (Table 2). The perseveration score for the WCST was predicted by RD of the anterior limb of the internal capsule.

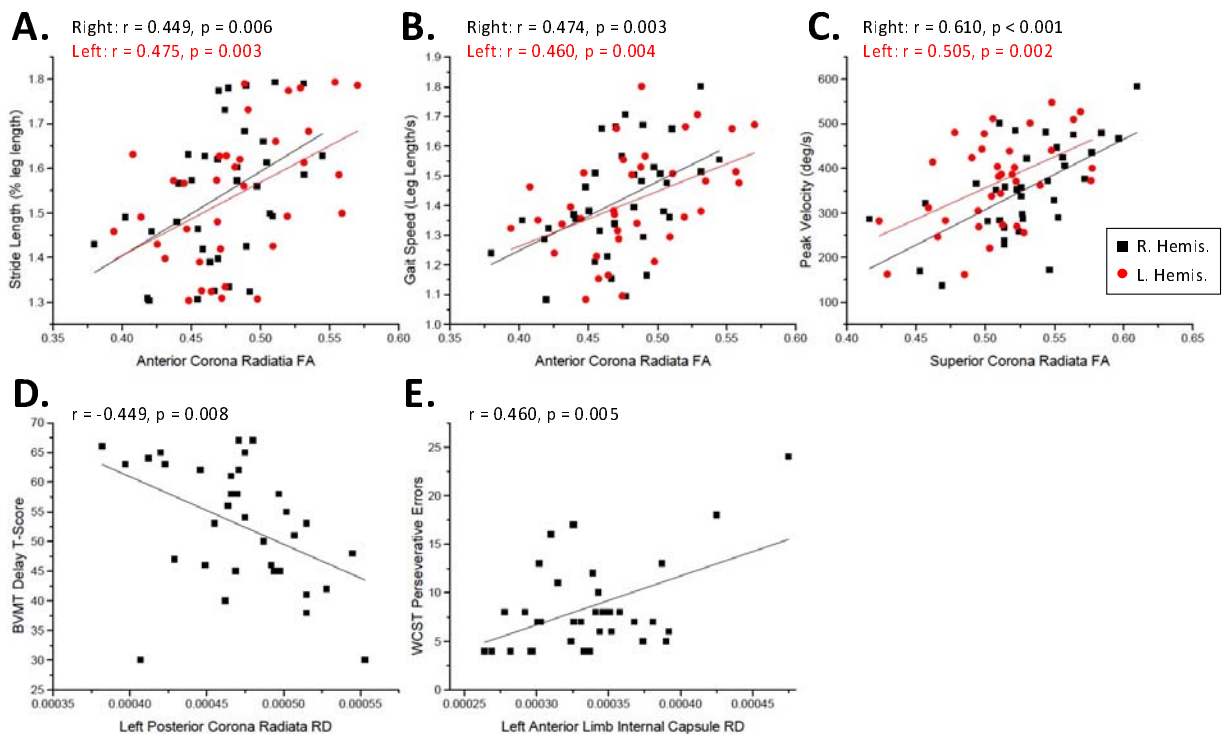

**Figure 5.** Pearson's correlations between diffusion measures and behavior: (A) anterior corona radiata FA vs. stride length, (B) anterior corona radiata FA vs. gait speed, (C) superior corona radiata FA vs. peak elbow movement velocity, (D) left posterior corona radiata RD vs. Brief Visual Memory Test (BVMT) delay T-score, (E) left anterior limb of the internal capsule RD vs. Wisconsin Card Sorting Task (WCST) total number of perseveration errors. Hemis. = hemisphere, L = left, R = right.

## Discussion

There were two main findings from this study: First, FA was significantly higher (RD and MD lower) in multiple regions of the white matter in the participants with Parkinson's disease who had normal REM sleep muscle activity (PD-RSWA), compared to those PD individuals with abnormally elevated REM motor tone (PD+RSWA) as well as to matched healthy older adults. Second, higher FA (or lower MD, RD) in specific pathways were associated with less motor impairment and better cognitive function in the overall group of Parkinson's disease participants.



Our finding of higher FA (lower RD, MD) in the Parkinson's disease cohort with normal REM motor atonia (PD-RSWA) relative to healthy older adults is consistent with many previous studies showing diffuse white matter differences in individuals with early-stage Parkinson's disease.<sup>15, 17, 26, 39, 40</sup> These papers reported significant differences in many of the pathways identified in the present study including the corpus callosum, anterior and superior corona radiata, anterior and posterior internal capsule, thalamic radiation and superior longitudinal fasciculus. Wen et al.<sup>26</sup> further showed that FA was significantly more elevated in individuals with Hoehn and Yahr Stage 1 Parkinson's disease compared to those with Hoehn and Yahr Stage 2 disease and that UPDRS III motor scores were inversely correlated with white matter FA and positively correlated with RD and MD. Importantly, prospective studies that have assessed changes in diffusion measures over the course of a year or more have shown a decrease in white matter FA or increase in RD and MD in association with increasing severity of disease.<sup>17-25</sup> Taken together, these findings suggest that the course of disease may be characterized, in some individuals, by an early period during which white matter FA is higher (lower RD and MD) than matched healthy older adults, particularly in callosal (genu, body), projection (anterior and superior corona radiata, internal capsule), and association (superior longitudinal fasciculus, posterior thalamic radiation) pathways, followed by a progressive decline in FA, in concert with worsening of motor disease severity, to levels at or below those seen in healthy older adults.

The novel finding of the present study was the observation that, when a cohort with mild-to-moderate severity of disease was separated, post hoc, into normal REM motor atonia (PD-RSWA) and abnormally elevated REM motor tone (PD+RSWA), only the PD-RSWA group showed significantly higher white matter FA relative to healthy older adults. The PD-RSWA group also showed significantly lower RD and MD across several white matter areas, compared to the healthy older adults. Conversely, these changes were not seen in the PD+RSWA group. The presence of significantly elevated FA in the PD-RSWA group, but not in the PD+RSWA group suggest a few conclusions.

First, if elevated white matter FA is a characteristic of early-stage disease<sup>26</sup> and progressively decreasing FA (from elevated, to normal, to below normal) reflects disease progression,<sup>25</sup> it could be argued that the absence of significantly elevated FA in the PD+RSWA cohort reflects

increased severity of disease, possibility due to an earlier onset and/or faster rate of progression in both motor and non-motor circuits relative to those without RSWA. This idea is corroborated by work showing that white matter FA in the corticospinal tract, corpus callosum and superior longitudinal fasciculus is significantly increased in people with isolated RBD compared to controls,<sup>41</sup> suggesting that elevated FA emerges during the prodromal phase of disease and that, by the time of diagnosis, white matter microstructural alterations have evolved to the point where there are no significant differences in FA from controls and may continue to progress to levels below controls. While there were no significant differences in clinical scores between the Parkinson's disease groups, quantitative motor assessments showed that gait and arm movement velocity were significantly impaired in the PD+RSWA group relative to the healthy older adult group, but not in the PD-RSWA group. Similarly, and consistent with prior investigations, frontal executive function and visuospatial memory were significantly more impaired in the PD+RSWA compared to the PD-RSWA group.<sup>12, 42, 43</sup> Longitudinal studies of people with PD+RSWA and PD-RSWA have provided evidence that the rate of dopaminergic denervation<sup>44</sup> and decline of cognitive and motor symptoms is greater in people with PD+RSWA.<sup>4, 45</sup> The results of cross-sectional studies comparing groups with Parkinson's disease with and without RBD (or probable RBD) using radiotracer assays of nigrostriatal dopaminergic function have been inconsistent. Some show greater reductions in people with RBD<sup>46, 47</sup> while others found no significant difference between groups.<sup>48, 49</sup> These findings reflect the limitations of radiotracer studies and demonstrate the need for more studies utilizing imaging methods enabling higher spatial resolutions.

Second, differences in white matter diffusion measures between the PD-RSWA and PD+RSWA groups may reflect differences in phenotype.<sup>50</sup> There is growing evidence that people that co-express Parkinson's disease and RBD have significant reductions in enteric, parasympathetic and sympathetic function, and increased involvement of brainstem nuclei and cortical structures. This is consistent with a more diffuse caudal-to-rostral distribution of synucleinopathy compared to those without RBD, despite similar levels of nigrostriatal dopaminergic denervation.<sup>49, 51</sup> Accordingly, differences in FA, MD and RD between groups could be due to phenotypic differences in the characteristics of axonal microstructure (i.e. PD-RSWA have inherently higher FA), the spatial distribution of synuclein-related degeneration that impacts the integrity of axonal

pathways, or the capacity for adaptive changes in structural and functional connectivity in response to nigral and extranigral neurodegeneration.

Increased white matter FA in early-stage Parkinson's Disease appears to reflect adaptive compensatory neuroplastic changes in axonal microstructure in response to nigrostriatal degeneration.<sup>15, 16, 26</sup> Increased FA could result from compensatory axonal sprouting in response to degeneration or alterations in the activity and/or synaptic connectivity of extranigral circuitry. Spontaneous behavioral recovery following partial lesions of the substantia nigra pars compacta in animal models of parkinsonism is associated with sprouting of collateral axons of surviving dopaminergic neurons.<sup>52</sup> Adaptive and maladaptive alterations in the morphology and synaptic connectivity of extranigral pathways also occur following dopaminergic denervation.<sup>14, 53-55</sup> Resting-state functional MRI studies have shown that the functional connectivity of sensorimotor cortical-subthalamic pathways is significantly increased in people with de novo (untreated) Parkinson's disease and that measures of connectivity correlate with the severity of motor disease.<sup>56, 57</sup> Accordingly, higher FA in the PD-RSWA group may reflect compensatory neuroplastic changes in the microstructure of axons aimed at maintaining the functional connectivity of extranigral pathways. The absence of a significant difference in FA in the PD+RSWA group could be explained by: (1) an earlier or increased rate of disease, such that neuroplastic adaptations occur predominantly during the prodromal phase, or (2) phenotypic differences in the capacity for neuroplasticity relative to those without RSWA.

Support for the idea that an increase in FA reflects a compensatory-like alteration in white matter microstructure comes from our data showing significant relationships between quantitative motor and cognitive measures, and diffusion measures in specific white matter tracts. Across all significant correlations, better motor and cognitive performance in the Parkinson's disease group was associated with higher FA and lower RD and MD. Regression analyses further showed that performance in specific motor domains could be predicted by diffusion measures in specific pathways. The spatiotemporal measures of gait (normalized speed and step length) were predicted by FA of the anterior corona radiata. The anterior corona radiata include corticofugal projections from the prefrontal cortex that are considered to play a role in the cognitive control of gait.<sup>58</sup> It has been hypothesized that increased activity in these pathways helps to compensate for

the loss of gait automaticity associated with progressive degeneration of nigrostriatal and pedunculopontine neurons in people with Parkinson's Disease. If higher FA in prefrontal projection pathways in the PD-RSWA group reflects a compensatory adaptation in connectivity, this may explain the absence of a significant deterioration in gait, relative to healthy older adults, and the “unmasking” of gait impairment in PD+RSWA. Arm bradykinesia, as measured by the peak velocity of ballistic elbow movements, was predicted by FA of the superior corona radiata. Force generation mediating this task is largely controlled by the output from the motor and premotor cortices via the corticospinal tract.<sup>59</sup> The gain in motor response is also dependent upon activity in the basal ganglia-thalamo-motor cortical pathway.<sup>60, 61</sup> Increased inhibition of the thalamus in the parkinsonian state could be compensated for by increased connectivity of thalamocortical connections and excitability of motor cortical output pathways. Consistent with this idea, long-term potentiation (LTP)-like motor cortical plasticity, as measured using the paired-associative stimulation technique, is increased contralateral to the clinically less-affected arm and decreased contralateral to the clinically more-affected arm in people with untreated (de novo) Parkinson's disease.<sup>62</sup> These mechanisms could explain the retention of movement speed in the PD-RSWA group and emergence of bradykinesia in people with PD+RSWA.

Higher white matter FA could also reflect degenerative processes that affect diffusion measures. Axonal degeneration is typically associated with reduced FA and increased in RD, MD and AD, reflecting decreased directionality of water diffusion and increased water diffusion respectively.<sup>63</sup> For example, work in the non-human primate model of parkinsonism has shown that the loss of substantia nigra dopaminergic neurons correlates with diffusion measures (RD, MD, AD) in nigrostriatal pathways.<sup>64</sup> When imaging white matter, fibers from multiple directions can contribute to the FA value of a given voxel, therefore, making the average direction of diffusion of water more isotropic and yielding a lower FA value. If selective crossing fibers within the voxel degenerate, the direction that water diffuses will be more “unidirectional” or more anisotropic leading to higher FA. There is extensive fiber crossing in many of the pathways that showed significantly higher FA in the PD-RSWA group, such as the anterior, superior and posterior corona radiata.<sup>65-67</sup> This raises the possibility that the higher FA observed in many of the white matter regions observed in this study reflect the loss of cortico-cortical or transcallosal crossing fibers that intersect corticofugal pathways.

Cognitive impairment is common in Parkinson's disease, particularly in executive function and visuospatial domains.<sup>68, 69</sup> Cognitive performance was significantly better in the PD-RSWA compared with the PD+RSWA group in measures of spatial-sequential working memory, visuospatial memory and frontal executive function. This finding is consistent with studies showing that people with Parkinson's disease and RBD are more likely to have impairment in executive function, attention and episodic learning and memory and visuospatial abilities compared to those without RBD.<sup>12, 70</sup> Similar to the motor data, better performance in these cognitive domains was associated with higher FA and lower RD and MD. Visuospatial memory on the BVMT was significantly predicted by RD of the left posterior corona radiata. Perseverations during the card sorting task (a measure of executive function) was predicted by RD in the left anterior limb of the internal capsule. Zheng et al.<sup>71</sup> have previously reported a similar relationship between diffusion measures in specific white matter tracts and cognitive performance in people with Parkinson's disease, that is, higher FA (lower MD) was associated with better scores on tests of executive function, attention, memory and language and attention. For example, executive function scores inversely correlated with MD in the anterior and posterior corona radiata, anterior limb of the internal capsule, genu of the corpus callosum, and superior and inferior fronto-occipital fasciculi.

There are several technical features of the present work that may have contributed to differences in the findings relative to previous diffusion MRI studies in early Parkinson's Disease. We used ultra-high field MRI at 7T, which provides higher signal-to-noise and increased spatial resolution (1.25mm isotropic voxel size), relative to conventional imaging at 1.5T or 3.0T, to better capture the diffusion characteristics of individual pathways. The TBSS analysis used improved tensor-based registration<sup>36</sup> and spatial normalization to a template image created from our data. This has been shown to produce fewer false positives.<sup>36</sup> Care was taken to minimize movement artifacts by using MRI acquisition protocols that were optimized for the study of patients with Parkinson's disease.<sup>32, 72-74</sup> All testing was conducted in the practically-defined off-medication state to lessen the potential confound of the effects of dopaminergic medication on diffusion measures.<sup>16</sup>

The findings of this study demonstrate that people with mild-to-moderate severity of Parkinson's disease, who have normal muscle tone during REM sleep, show significant alterations in diffusion measures of white matter microstructure consistent with compensatory neuroplasticity, but these alterations are largely absent in those with PD+RSWA. Higher FA and lower MD and RD were associated with lower motor impairment and better performance on executive function and visuospatial memory tests. Performance in specific motor (gait, arm movements) and cognitive tasks was predicted by diffusion measures from specific white matter pathways in the people with Parkinson's Disease. Higher FA and lower MD and RD could reflect compensatory adaptations in structural connectivity in response to nigral and extranigral cell loss that impact the expression of motor and non-motor signs, and/or early degenerative changes in white matter microstructure. Further neuroimaging investigations of individuals with alpha-synuclein pathology, using ultra-high-field MRI, are warranted. In particular, we advise exploring white matter changes in prodromal Parkinson's Disease by investigating individuals with isolated RBD as well as comparing imaging findings with other known markers of neuroplasticity. Ultimately the goal of these investigations is to fully characterize the natural history of alpha-synuclein pathology, identify biophysiological markers of disease progression, and identify potential targets to delay, prevent or reverse Parkinson's Disease pathology. Future work in this area should also include machine-learning approaches to discriminate the PD+RSWA and PD-RSWA groups from healthy people, based on the diffusion metrics, with an objective to develop a method for early diagnosis of the disease.

## Acknowledgements

We thank the volunteers that participated in this study. We are grateful for our additional referring movement disorders specialists including Dr. Martha Nance, MD, Dr. Daniel Kuyper, MD, and Dr. Sotirios Parashos, MD at Struthers Parkinson's Center and Dr. Julia Johnson, MD at HealthPartners Parkinson's Center.

## Funding

This project was by funding from: NIH RO1-NS088679, NIH RO1-NS113746, NIH UL1TR000114, NIH R01-NS085188; NIH P50-NS098573, P41 EB015894; P30 NS076408, grant number 2020-225709 from the Chan Zuckerberg Initiative DAF, an advised fund of Silicon Valley Community Foundation, awarded to PKP, NIH R21 NS108022 (AV), NIH training grant T32GM008471 (MLE), NSFNRT Fellowship DGE-1734815 (MLE), the Wallin Neuroscience Foundation (JWC), the MnDRIVE Fellowship (SLAH, JWC, MNP), the Parkinson Study Group (MNP), and the Parkinson's Disease Foundation's Advancing Parkinson's Treatments Innovations Grant (MNP)

## Competing interests

RP is a consultant for Surgical Information Sciences, Inc. Noam Harel is a co-founder and consultant for Surgical Information Sciences, Inc. The other authors do not have any competing interests to report.

## References

1. Boeve BF, Silber MH, Saper CB, et al. Pathophysiology of REM sleep behaviour disorder and relevance to neurodegenerative disease. *Brain*. Nov 2007;130(Pt 11):2770-88. doi:10.1093/brain/awm056
2. Plomhause L, Dujardin K, Duhamel A, et al. Rapid eye movement sleep behavior disorder in treatment-naive Parkinson disease patients. *Sleep medicine*. Oct 2013;14(10):1035-7. doi:10.1016/j.sleep.2013.04.018

3. Sixel-Doring F, Trautmann E, Mollenhauer B, Trenkwalder C. Rapid eye movement sleep behavioral events: a new marker for neurodegeneration in early Parkinson disease? *Sleep*. Mar 2014;37(3):431-8. doi:10.5665/sleep.3468
4. Duarte Folle A, Paul KC, Bronstein JM, Keener AM, Ritz B. Clinical progression in Parkinson's disease with features of REM sleep behavior disorder: A population-based longitudinal study. *Parkinsonism Relat Disord*. May 2019;62:105-111. doi:10.1016/j.parkreldis.2019.01.018
5. Schenck CH, Bundlie SR, Ettinger MG, Mahowald MW. Chronic behavioral disorders of human REM sleep: a new category of parasomnia. *Case Reports. Sleep*. Jun 1986;9(2):293-308.
6. Postuma RB, Iranzo A, Hu M, et al. Risk and predictors of dementia and parkinsonism in idiopathic REM sleep behaviour disorder: a multicentre study. *Brain*. Mar 1 2019;142(3):744-759. doi:10.1093/brain/awz030
7. Haba-Rubio J, Frauscher B, Marques-Vidal P, et al. Prevalence and determinants of rapid eye movement sleep behavior disorder in the general population. *Sleep*. Feb 1 2018;41(2)doi:10.1093/sleep/zsx197
8. Sixel-Doring F, Trautmann E, Mollenhauer B, Trenkwalder C. Associated factors for REM sleep behavior disorder in Parkinson disease. *Comparative Study. Neurology*. Sep 13 2011;77(11):1048-54. doi:10.1212/WNL.0b013e31822e560e
9. Postuma RB, Gagnon JF, Vendette M, Charland K, Montplaisir J. REM sleep behaviour disorder in Parkinson's disease is associated with specific motor features. *Journal of neurology, neurosurgery, and psychiatry*. Oct 2008;79(10):1117-21. doi:10.1136/jnnp.2008.149195
10. Romenets SR, Gagnon JF, Latreille V, et al. Rapid eye movement sleep behavior disorder and subtypes of Parkinson's disease. *Movement disorders*. Jul 2012;27(8):996-1003. doi:10.1002/mds.25086
11. Linn-Evans ME, Petrucci MN, Amundsen Huffmaster SL, et al. REM sleep without atonia is associated with increased rigidity in patients with mild to moderate Parkinson's disease. *Clinical neurophysiology*. Aug 2020;131(8):2008-2016. doi:10.1016/j.clinph.2020.04.017
12. Jozwiak N, Postuma RB, Montplaisir J, et al. REM Sleep Behavior Disorder and Cognitive Impairment in Parkinson's Disease. *Sleep*. Aug 1 2017;40(8)doi:10.1093/sleep/zsx101



13. Amundsen Huffmaster SL, Petrucci MN, Linn-Evans ME, et al. REM Sleep Without Atonia and Gait Impairment in People with Mild to Moderate Parkinson's Disease. *Journal of Parkinson's disease*. Jan 26 2021;doi:10.3233/JPD-202098
14. Blesa J, Trigo-Damas I, Dileone M, Del Rey NL, Hernandez LF, Obeso JA. Compensatory mechanisms in Parkinson's disease: Circuits adaptations and role in disease modification. *Experimental neurology*. Dec 2017;298(Pt B):148-161. doi:10.1016/j.expneurol.2017.10.002
15. Mole JP, Subramanian L, Bracht T, Morris H, Metzler-Baddeley C, Linden DE. Increased fractional anisotropy in the motor tracts of Parkinson's disease suggests compensatory neuroplasticity or selective neurodegeneration. *Eur Radiol*. Oct 2016;26(10):3327-35. doi:10.1007/s00330-015-4178-1
16. Atkinson-Clement C, Pinto S, Eusebio A, Coulon O. Diffusion tensor imaging in Parkinson's disease: Review and meta-analysis. *Neuroimage Clin*. 2017;16:98-110. doi:10.1016/j.nicl.2017.07.011
17. Taylor KI, Sambataro F, Boess F, Bertolino A, Dukart J. Progressive Decline in Gray and White Matter Integrity in de novo Parkinson's Disease: An Analysis of Longitudinal Parkinson Progression Markers Initiative Diffusion Tensor Imaging Data. *Front Aging Neurosci*. 2018;10:318. doi:10.3389/fnagi.2018.00318
18. Melzer TR, Myall DJ, MacAskill MR, et al. Tracking Parkinson's Disease over One Year with Multimodal Magnetic Resonance Imaging in a Group of Older Patients with Moderate Disease. *PloS one*. 2015;10(12):e0143923. doi:10.1371/journal.pone.0143923
19. Zhang Y, Wu IW, Tosun D, Foster E, Schuff N, Parkinson's Progression Markers I. Progression of Regional Microstructural Degeneration in Parkinson's Disease: A Multicenter Diffusion Tensor Imaging Study. *PloS one*. 2016;11(10):e0165540. doi:10.1371/journal.pone.0165540
20. Chan LL, Ng KM, Yeoh CS, Rumpel H, Li HH, Tan EK. Putaminal Diffusivity Correlates With Disease Progression in Parkinson's Disease: Prospective 6-Year Study. *Medicine (Baltimore)*. Feb 2016;95(6):e2594. doi:10.1097/MD.0000000000002594
21. Caspell-Garcia C, Simuni T, Tosun-Turgut D, et al. Multiple modality biomarker prediction of cognitive impairment in prospectively followed de novo Parkinson disease. *PloS one*. 2017;12(5):e0175674. doi:10.1371/journal.pone.0175674

22. Minett T, Su L, Mak E, et al. Longitudinal diffusion tensor imaging changes in early Parkinson's disease: ICICLE-PD study. *Journal of neurology*. Jul 2018;265(7):1528-1539. doi:10.1007/s00415-018-8873-0
23. Pozorski V, Oh JM, Adluru N, et al. Longitudinal white matter microstructural change in Parkinson's disease. *Human brain mapping*. Oct 2018;39(10):4150-4161. doi:10.1002/hbm.24239
24. Rau YA, Wang SM, Tournier JD, et al. A longitudinal fixel-based analysis of white matter alterations in patients with Parkinson's disease. *Neuroimage Clin*. 2019;24:102098. doi:10.1016/j.nicl.2019.102098
25. Sarasso E, Agosta F, Piramide N, Filippi M. Progression of grey and white matter brain damage in Parkinson's disease: a critical review of structural MRI literature. *Journal of neurology*. May 6 2020;doi:10.1007/s00415-020-09863-8
26. Wen MC, Heng HS, Ng SY, Tan LC, Chan LL, Tan EK. White matter microstructural characteristics in newly diagnosed Parkinson's disease: An unbiased whole-brain study. *Sci Rep*. Oct 20 2016;6:35601. doi:10.1038/srep35601
27. Postuma RB, Berg D, Stern M, et al. MDS clinical diagnostic criteria for Parkinson's disease. *Movement disorders*. Oct 2015;30(12):1591-601. doi:10.1002/mds.26424
28. Nasreddine ZS, Phillips NA, Bedirian V, et al. The Montreal Cognitive Assessment, MoCA: a brief screening tool for mild cognitive impairment. *J Am Geriatr Soc*. Apr 2005;53(4):695-9. doi:10.1111/j.1532-5415.2005.53221.x
29. Karlawish J, Cary M, Moelter ST, et al. Cognitive impairment and PD patients' capacity to consent to research. *Neurology*. Aug 27 2013;81(9):801-7. doi:10.1212/WNL.0b013e3182a05ba5
30. Berry RB, Brooks R, Gamaldo CE, Harding SM, Lloyd RM. *AASM Manual for the Scoring of Sleep and Associated Events: Rules, Terminology, and Technical Specifications, Version 2.5*. 2018.
31. Galna B, Lord S, Rochester L. Is gait variability reliable in older adults and Parkinson's disease? Towards an optimal testing protocol. *Gait & posture*. Apr 2013;37(4):580-5. doi:10.1016/j.gaitpost.2012.09.025

32. Duchin Y, Shamir RR, Patriat R, et al. Patient-specific anatomical model for deep brain stimulation based on 7 Tesla MRI. *PloS one*. 2018;13(8):e0201469. doi:10.1371/journal.pone.0201469
33. Andersson JLR, Skare S, Ashburner J. How to correct susceptibility distortions in spin-echo echo-planar images: application to diffusion tensor imaging. *NeuroImage*. 2003;20(2):870-888. doi:10.1016/s1053-8119(03)00336-7
34. Andersson JLR, Sotiropoulos SN. An integrated approach to correction for off-resonance effects and subject movement in diffusion MR imaging. *NeuroImage*. Jan 15 2016;125:1063-1078. doi:10.1016/j.neuroimage.2015.10.019
35. Smith SM, Jenkinson M, Woolrich MW, et al. Advances in functional and structural MR image analysis and implementation as FSL. *NeuroImage*. 2004;23 Suppl 1:S208-19. doi:10.1016/j.neuroimage.2004.07.051
36. Zhang H, Avants BB, Yushkevich PA, et al. High-dimensional spatial normalization of diffusion tensor images improves the detection of white matter differences: an example study using amyotrophic lateral sclerosis. *IEEE Trans Med Imaging*. Nov 2007;26(11):1585-97. doi:10.1109/TMI.2007.906784
37. Bach M, Laun FB, Leemans A, et al. Methodological considerations on tract-based spatial statistics (TBSS). *NeuroImage*. Oct 15 2014;100:358-69. doi:10.1016/j.neuroimage.2014.06.021
38. Winkler AM, Ridgway GR, Webster MA, Smith SM, Nichols TE. Permutation inference for the general linear model. *NeuroImage*. May 15 2014;92:381-97. doi:10.1016/j.neuroimage.2014.01.060
39. Tessa C, Giannelli M, Della Nave R, et al. A whole-brain analysis in de novo Parkinson disease. *AJNR American journal of neuroradiology*. Apr 2008;29(4):674-80. doi:10.3174/ajnr.A0900
40. Bergamino M, Keeling EG, Mishra VR, Stokes AM, Walsh RR. Assessing White Matter Pathology in Early-Stage Parkinson Disease Using Diffusion MRI: A Systematic Review. *Frontiers in neurology*. 2020;11:314. doi:10.3389/fneur.2020.00314
41. Holtbernd F, Romanzetti S, Oertel WH, et al. Convergent patterns of structural brain changes in rapid eye movement sleep behavior disorder and Parkinson's disease on behalf of the German rapid eye movement sleep behavior disorder study group. *Sleep*. Mar 12 2021;44(3)doi:10.1093/sleep/zsaa199

42. Vendette M, Gagnon JF, Decary A, et al. REM sleep behavior disorder predicts cognitive impairment in Parkinson disease without dementia. *Neurology*. Nov 6 2007;69(19):1843-9. doi:10.1212/01.wnl.0000278114.14096.74
43. Pagano G, De Micco R, Yousaf T, Wilson H, Chandra A, Politis M. REM behavior disorder predicts motor progression and cognitive decline in Parkinson disease. *Neurology*. Sep 4 2018;91(10):e894-e905. doi:10.1212/WNL.0000000000006134
44. Kim YE, Kim YJ, Hwang HS, Ma HI. REM sleep behavior disorder in early Parkinson's disease predicts the rapid dopaminergic denervation. *Parkinsonism Relat Disord*. Nov 2020;80:120-126. doi:10.1016/j.parkreldis.2020.09.032
45. Bugalho P, Viana-Baptista M. REM sleep behavior disorder and motor dysfunction in Parkinson's disease--a longitudinal study. *Parkinsonism Relat Disord*. Dec 2013;19(12):1084-7. doi:10.1016/j.parkreldis.2013.07.017
46. Arnaldi D, De Carli F, Picco A, et al. Nigro-caudate dopaminergic deafferentation: a marker of REM sleep behavior disorder? *Neurobiology of aging*. Dec 2015;36(12):3300-3305. doi:10.1016/j.neurobiolaging.2015.08.025
47. Arnaldi D, Morbelli S, Brugnolo A, et al. Functional neuroimaging and clinical features of drug naive patients with de novo Parkinson's disease and probable RBD. *Parkinsonism Relat Disord*. Aug 2016;29:47-53. doi:10.1016/j.parkreldis.2016.05.031
48. Zoetmulder M, Nikolic M, Biernat H, Korbo L, Friberg L, Jennum P. Increased Motor Activity During REM Sleep Is Linked with Dopamine Function in Idiopathic REM Sleep Behavior Disorder and Parkinson Disease. *J Clin Sleep Med*. Jun 15 2016;12(6):895-903. doi:10.5664/jcsm.5896
49. Horsager J, Andersen KB, Knudsen K, et al. Brain-first versus body-first Parkinson's disease: a multimodal imaging case-control study. *Brain*. Oct 1 2020;143(10):3077-3088. doi:10.1093/brain/awaa238
50. St Louis EK, Boeve AR, Boeve BF. REM Sleep Behavior Disorder in Parkinson's Disease and Other Synucleinopathies. *Movement disorders*. May 2017;32(5):645-658. doi:10.1002/mds.27018
51. Pyatigorskaya N, Yahia-Cherif L, Valabregue R, et al. Parkinson Disease Propagation Using MRI Biomarkers and Partial Least Squares Path Modeling. *Neurology*. Dec 4 2020;doi:10.1212/WNL.0000000000011155

52. Arkadir D, Bergman H, Fahn S. Redundant dopaminergic activity may enable compensatory axonal sprouting in Parkinson disease. *Neurology*. Mar 25 2014;82(12):1093-8. doi:10.1212/WNL.0000000000000243
53. Fan KY, Baufreton J, Surmeier DJ, Chan CS, Bevan MD. Proliferation of external globus pallidus-subthalamic nucleus synapses following degeneration of midbrain dopamine neurons. *The Journal of neuroscience* Oct 3 2012;32(40):13718-28. doi:10.1523/JNEUROSCI.5750-11.2012
54. Chu HY, Atherton JF, Wokosin D, Surmeier DJ, Bevan MD. Heterosynaptic regulation of external globus pallidus inputs to the subthalamic nucleus by the motor cortex. *Neuron*. Jan 21 2015;85(2):364-76. doi:10.1016/j.neuron.2014.12.022
55. Chu HY, McIver EL, Kovaleski RF, Atherton JF, Bevan MD. Loss of Hyperdirect Pathway Cortico-Subthalamic Inputs Following Degeneration of Midbrain Dopamine Neurons. *Neuron*. Sep 13 2017;95(6):1306-1318 e5. doi:10.1016/j.neuron.2017.08.038
56. Baudrexel S, Witte T, Seifried C, et al. Resting state fMRI reveals increased subthalamic nucleus-motor cortex connectivity in Parkinson's disease. *NeuroImage*. Apr 15 2011;55(4):1728-38. doi:10.1016/j.neuroimage.2011.01.017
57. Kurani AS, Seidler RD, Burciu RG, et al. Subthalamic nucleus--sensorimotor cortex functional connectivity in de novo and moderate Parkinson's disease. *Neurobiology of aging*. Jan 2015;36(1):462-9. doi:10.1016/j.neurobiolaging.2014.07.004
58. Ehgoetz Martens KA, Peterson DS, Almeida QJ, Lewis SJG, Hausdorff JM, Nieuwboer A. Behavioural manifestations and associated non-motor features of freezing of gait: A narrative review and theoretical framework. *Neuroscience and biobehavioral reviews*. Sep 2020;116:350-364. doi:10.1016/j.neubiorev.2020.06.026
59. Lemon RN. Descending pathways in motor control. *Annual review of neuroscience*. 2008;31:195-218. doi:10.1146/annurev.neuro.31.060407.125547
60. Pfann KD, Buchman AS, Comella CL, Corcos DM. Control of movement distance in Parkinson's disease. *Research Support, U.S. Gov't, P.H.S. Movement disorders*. Nov 2001;16(6):1048-65.
61. Bologna M, Paparella G, Fasano A, Hallett M, Berardelli A. Evolving concepts on bradykinesia. *Brain*. Dec 13 2019;doi:10.1093/brain/awz344

62. Kojovic M, Bologna M, Kassavetis P, et al. Functional reorganization of sensorimotor cortex in early Parkinson disease. *Neurology*. May 1 2012;78(18):1441-8. doi:10.1212/WNL.0b013e318253d5dd
63. Winklewski PJ, Sabisz A, Naumczyk P, Jodzio K, Szurowska E, Szarmach A. Understanding the Physiopathology Behind Axial and Radial Diffusivity Changes-What Do We Know? *Frontiers in neurology*. 2018;9:92. doi:10.3389/fneur.2018.00092
64. Shimony JS, Rutlin J, Karimi M, et al. Validation of diffusion tensor imaging measures of nigrostriatal neurons in macaques. *PloS one*. 2018;13(9):e0202201. doi:10.1371/journal.pone.0202201
65. Wedeen VJ, Rosene DL, Wang R, et al. The geometric structure of the brain fiber pathways. *Science*. Mar 30 2012;335(6076):1628-34. doi:10.1126/science.1215280
66. Jeurissen B, Leemans A, Tournier JD, Jones DK, Sijbers J. Investigating the prevalence of complex fiber configurations in white matter tissue with diffusion magnetic resonance imaging. *Human brain mapping*. Nov 2013;34(11):2747-66. doi:10.1002/hbm.22099
67. Andersson M, Kjer HM, Rafael-Patino J, et al. Axon morphology is modulated by the local environment and impacts the noninvasive investigation of its structure-function relationship. *Proceedings of the National Academy of Sciences of the United States of America*. Dec 29 2020;117(52):33649-33659. doi:10.1073/pnas.2012533117
68. Aarsland D, Bronnick K, Fladby T. Mild cognitive impairment in Parkinson's disease. *Current neurology and neuroscience reports*. Aug 2011;11(4):371-8. doi:10.1007/s11910-011-0203-1
69. Nombela C, Rowe JB, Winder-Rhodes SE, et al. Genetic impact on cognition and brain function in newly diagnosed Parkinson's disease: ICICLE-PD study. *Brain*. Oct 2014;137(Pt 10):2743-58. doi:10.1093/brain/awu201
70. Xie D, Shen Q, Zhou J, Xu Y. Non-motor symptoms are associated with REM sleep behavior disorder in Parkinson's disease: a systematic review and meta-analysis. *Neurological sciences*. Jan 2021;42(1):47-60. doi:10.1007/s10072-020-04769-9
71. Zheng Z, Shemmassian S, Wijekoon C, Kim W, Bookheimer SY, Pouratian N. DTI correlates of distinct cognitive impairments in Parkinson's disease. *Human brain mapping*. Apr 2014;35(4):1325-33. doi:10.1002/hbm.22256

72. Abosch A, Yacoub E, Ugurbil K, Harel N. An assessment of current brain targets for deep brain stimulation surgery with susceptibility-weighted imaging at 7 tesla. *Neurosurgery*. Dec 2010;67(6):1745-56; discussion 1756. doi:10.1227/NEU.0b013e3181f74105
73. Lenglet C, Abosch A, Yacoub E, De Martino F, Sapiro G, Harel N. Comprehensive in vivo mapping of the human basal ganglia and thalamic connectome in individuals using 7T MRI. *PloS one*. 2012;7(1):e29153. doi:10.1371/journal.pone.0029153
74. Plantinga BR, Temel Y, Duchin Y, et al. Individualized parcellation of the subthalamic nucleus in patients with Parkinson's disease with 7T MRI. *NeuroImage*. Sep 26 2016;doi:10.1016/j.neuroimage.2016.09.023
75. Tomlinson CL, Stowe R, Patel S, Rick C, Gray R, Clarke CE. Systematic review of levodopa dose equivalency reporting in Parkinson's disease. *Movement disorders*. Nov 15 2010;25(15):2649-53. doi:10.1002/mds.23429

**Table 1.** Demographic and clinical characteristics of the participants.

|                                    | Healthy Older Adults | PD-RSWA     | PD+RSWA     | Significance (p) |
|------------------------------------|----------------------|-------------|-------------|------------------|
| N (# of females) <sup>1</sup>      | 21 (11)              | 20 (6)      | 18 (9)      | 0.294            |
| Age (years) <sup>2</sup>           | 61.3 ± 8.0           | 63.0 ± 8.6  | 65.8 ± 4.8  | 0.206            |
| Education (years) <sup>2</sup>     | 16.0 ± 2.5           | 16.1 ± 1.0  | 16.8 ± 2.6  | 0.517            |
| MoCA scores <sup>3</sup>           | 26.8 ± 2.0           | 27.6 ± 1.8  | 27.5 ± 1.9  | 0.358            |
| Years since diagnosis <sup>4</sup> | N/A                  | 2.1 ± 1.5   | 2.8 ± 2.2   | 0.079            |
| MDS-UPDRS III <sup>5</sup>         | N/A                  | 34.4 ± 12.0 | 41.2 ± 14.5 | 0.118            |
| Hoehn and Yahr Stage <sup>4</sup>  | N/A                  | 2.1 ± 0.3   | 2.3 ± 0.5   | 0.082            |
| Levodopa Eq (mg) <sup>4</sup>      | N/A                  | 140 ± 175   | 365 ± 397   | <b>0.032</b>     |

Statistical tests performed to compared groups: <sup>1</sup> Chi Square, <sup>2</sup> Kruskal-Wallis (H), <sup>3</sup> Univariate ANOVA, <sup>4</sup> Mann-Whitney U, <sup>5</sup> T-Test. N/A = not applicable. <sup>a</sup> Levodopa equivalent dosages were calculated using the conversion factors provided by Tomlinson et al. <sup>75</sup>. PD+RSWA= Parkinson's disease with RSWA. PD-RSWA= Parkinson's disease without RSWA.



**Table 2.** Summary of significant partial correlations and regressions between motor and cognitive outcome measures and mean white matter pathway diffusion measures.

| Behavioral variable         | Partial Correlations                      |              |        | Step-Wise Regression                      |               |        |         |       |
|-----------------------------|-------------------------------------------|--------------|--------|-------------------------------------------|---------------|--------|---------|-------|
|                             | White Matter Pathway Mean (FA, RD, or MD) | r            | p      | White Matter Pathway Mean (FA, RD, or MD) | Beta (stand.) | t      | p       |       |
| MDS-UPDRS III               | FA Right SCR                              | -0.542       | 0.001  | FA Right SCR                              | -0.518        | -3.535 | 0.001   |       |
| MDS-UPDRS Axial             | FA Right SCR                              | -0.542       | 0.001  | RD Right SLF                              | 0.572         | 4.070  | < 0.001 |       |
|                             | RD Right SCR                              | 0.484        | 0.004  |                                           |               |        |         |       |
|                             | RD Right SLF                              | 0.545        | 0.001  |                                           |               |        |         |       |
|                             | RD Left SLF                               | 0.535        | 0.001  |                                           |               |        |         |       |
|                             | MD Left SLF                               | 0.450        | 0.009  |                                           |               |        |         |       |
| Normalized gait speed       | FA Right ACR                              | 0.455        | 0.008  | FA Right ACR                              | 0.407         | 2.762  | 0.009   |       |
|                             | FA Left ACR                               | 0.497        | 0.003  | + FA Left PLIC                            | 0.312         | 2.116  | 0.042   |       |
| Normalized stride Length    | FA Left ACR                               | 0.476        | 0.005  | FA Left ACR                               | 0.475         | 3.146  | 0.003   |       |
|                             | FA Left PLIC                              | 0.462        | 0.007  |                                           |               |        |         |       |
| Normalized step Length      | Right                                     | FA Right ACR | 0.452  | 0.008                                     | FA Right ACR  | 0.478  | 3.173   | 0.003 |
|                             | Left                                      | FA Left ACR  | 0.514  | 0.002                                     | FA Left ACR   | 0.491  | 3.282   | 0.002 |
|                             |                                           | FA Left PLIC | 0.503  | 0.003                                     |               |        |         |       |
| Peak elbow flexion velocity | Right                                     | FA Left SCR  | 0.517  | 0.002                                     | FA Left SCR   | 0.480  | 3.609   | 0.001 |
|                             |                                           | RD Left SCR  | -0.516 | 0.002                                     | + FA Left SLF | 0.439  | 3.007   | 0.005 |
|                             |                                           | MD Left SLF  | -0.505 | 0.003                                     | + RD Left PTR | 0.428  | 2.858   | 0.088 |
|                             | Left                                      | FA Left SCR  | 0.563  | 0.001                                     | + MD Left SLF | -0.310 | -2.299  | 0.029 |
|                             | RD Left SCR                               | -0.508       | 0.003  | FA Left SCR                               | 0.628         | 4.634  | < 0.001 |       |
| BVMC Score                  | Total of trials 1 to 3                    |              |        | RD Left PCR                               | -0.449        | -2.844 | 0.008   |       |
|                             | Delay (raw score)                         |              |        | RD Left PCR                               | -0.451        | -2.855 | 0.008   |       |
|                             | Delay (T-score)                           |              |        | RD Left PCR                               | -0.449        | -2.39  | 0.008   |       |
| WCST                        | Number of Categories                      | FA Left ALIC | 0.456  | 0.009                                     |               |        |         |       |
|                             | Perseveration Score                       | FA Left ALIC | -0.532 | 0.002                                     | RD Left ALIC  | 0.460  | 3.024   | 0.005 |
|                             |                                           | RD Left ALIC | 0.481  | 0.005                                     |               |        |         |       |
|                             |                                           | FA Right SCR | -0.469 | 0.007                                     |               |        |         |       |

Abbreviations: AD = axial diffusion, ACR = anterior corona radiata, ALIC = anterior limb of internal capsule, BVMC = Brief Visual Memory Test, FA = fractional anisotropy, MD = mean diffusion, MDS-UPDRS = Movement Disorders Society-Unified Parkinson's Disease Rating Scale, PCR = posterior corona radiata, PLIC = posterior limb internal capsule, RD = radial diffusion, Beta (stand.) = standardized beta score, SCR = superior corona radiata, SLF = superior longitudinal fasciculus, WCST = Wisconsin Card Sorting Task \*Partial correlations for

cognitive variables controlled for sex, age and education. Motor variables controlled for sex and age.

## Figure Legends

**Figure 1.** Flow diagram depicting the image processing and analysis pipeline. Words in parenthesis indicate the software being used for a particular step. TBSS = Tract-based spatial statistics. DTI = Diffusion tensor imaging. MRI = Magnetic resonance imaging.

**Figure 2.** 3D axial views TBSS results showing the regions where statistically significant differences between different groups (columns) were observed, in different diffusion metrics (rows). S= superior, R = right, P = posterior. Warm colors show a positive difference while cold colors show a negative difference.

**Figure 3.** 2D axial views of the TBSS results showing the main regions where statistically significant differences between different groups (columns) were observed, in different diffusion metrics (rows). R = right, L = left, A = anterior, P = posterior.

**Figure 4.** Summary of behavioral results. Plots A-B show the average normalized gait speed and normalized stride length during steady-state gait for each individual in the control (CON=black), PD-RSWA (red) and PD+RSWA (blue) groups. Plots C-D show the average peak velocities during ballistic elbow movement. Normalized gait speed, step length and right and left peak elbow movement velocity were significantly lower in the PD+RSWA group compared to healthy older adults (\* =  $p < 0.037$ ). Plots E-H show the results from some of the cognitive tests including the Wechsler Memory Scale – Scaled Score (WMS) (plot E), Wisconsin Card Sorting Task (WCST) – total number of perseveration errors (plot F), Brief Visual Memory test (BVMT) – total score from trials 1 to 3 (plot G), and BVMT delay T-score (plot H). Scores for each of these tests were significantly lower in the PD+RSWA group compared to the PD-RSWA group (\* =  $p < 0.042$ ). PD+RSWA= Parkinson’s disease with RSWA. PD-RSWA= Parkinson’s disease without RSWA.

**Figure 5.** Pearson’s correlations between diffusion measures and behavior: (A) anterior corona radiata FA vs. stride length, (B) anterior corona radiata FA vs. gait speed, (C) superior corona radiata FA vs. peak elbow movement velocity, (D) left posterior corona radiata RD vs. Brief Visual Memory Test (BVMT) delay T-score, (E) left anterior limb of the internal capsule RD vs.

Wisconsin Card Sorting Task (WCST) total number of perseveration errors. Hemis. = hemisphere, L = left, R = right.
